# Supplementary material
Source: PubMed Central journal article supplement (PMC2709347)
Supplement: supp_M109.002691_jbc.M109.002691-1.pdf [file supp_M109.002691_jbc.M109.002691-1.pdf]

## SUPPLEMENTAL FIGURE LEGENDS

Figure S1. Immunohistochemical analysis of TAK1 skin wound biopsy. **(A)** Negative control. Immunohistochemical staining of Day 5 mouse wound biopsies with pre-immune IgG as negative control. The section was processed as described in Figure 1B. Representative picture from wound epithelium and the adjacent wound bed was shown. E: epidermis; WB: wound bed; Scale bar 20  $\mu\text{m}$ . **(B)** Relative expression level of TAK1 mRNA in normal human skin and biopsies from chronic non healing ulcers as determined by qPCR. Cyclophilin was used as a normalizing housekeeping gene. Statistical analysis was determined using two-tailed Mann-Whitney test, \*\*\* denotes  $p < 0.001$ .

Figure S2. TAK1-deficient keratinocytes migrate faster, independent of cell proliferation. **(A)** Time-lapsed images of wounded cultures of control ( $K_{CTRL}$ ) and TAK1-knockdown ( $K_{TAK1-B}$ ) treated with mitomycin C (2  $\mu\text{g}/\text{ml}$ ). Scale bar 100  $\mu\text{m}$ . See videos S3-4. Higher magnification images from video microscopy showing migratory front of  $K_{CTRL}$  and  $K_{TAK1-B}$  (bottom two panels). Arrows indicate the focal adhesion points and microspike-like extensions in lamellipodia during migration. Scale bar 20  $\mu\text{m}$ .

Figure S3. TAK1 deficiency enhances cell migration. Immunoblot analysis of active cdc42, Rac1 and RhoA in  $K_{CTRL}$  and  $K_{TAK1-B}$  exposed to serum for the indicated time periods (min). Values below the blots represent the mean fold change in active cdc42, Rac1 and RhoA relative to level at zero min of  $K_{CTRL}$  ( $n=5$ ). Representative pictures of immunoblot were shown.

Figure S4. TAK1 plays a homeostatic role in epidermal proliferation. Immunofluorescence staining of  $K_{CTRL}$  and  $K_{TAK1-B}$ -derived organotypic skin cultures (OTCs). Keratin 10 (CK 10) and involucrin (INV) were late and terminal epidermal differentiation, respectively. Proliferating and apoptotic cells were identified using Ki67 antibody and TUNEL assay, respectively (white arrows). OTC sections were counterstained with DAPI (blue). Dotted line represents epidermal-dermal junction. F denotes the underlying fibroblasts-embedded collagen. White dotted lines indicate epidermal-dermal junction. H&E: Haematoxylin and eosin staining. Scale bar 40  $\mu\text{m}$ . Mean proliferating and apoptotic cells were numerated from 3 standardized microscopic fields per section, performed on 3 sections from 4 independent OTC constructions ( $n=36$ ).

Figure S5. TAK1 regulates epidermal proliferation via a double paracrine signaling involving PDGF-B. **(A)** Immunofluorescence staining of  $K_{CTRL}$  and  $K_{TAK1-B}$ -derived OTCs cultured with only collagen (COL). In the absence of underlying fibroblasts, no difference in cell proliferation index was observed between  $K_{CTRL}$  and  $K_{TAK1-B}$  epidermis. Proliferating cells were identified using Ki67 antibody (white arrows). OTC sections were counterstained with DAPI (blue). White dotted lines indicate epidermal-dermal junction. **(B)** Human Growth Factor Antibody Array I (RayBio®): Protein analysis of conditioned medium from two-weeks old  $K_{CTRL}$  and  $K_{TAK1-B}$ -derived OTCs. Spots corresponding to HGF, PDGF-BB and TGF- $\beta$  were boxed. Representative pictures of array were shown. **(C)** Immunofluorescence staining of  $K_{CTRL}$ - and  $K_{TAK1-B}$ -derived OTCs cultured with underlying fibroblasts (F) in the presence either vehicle (PBS) or neutralizing anti-PDGF- antibody. Blocking the activity of PDGF negates the pro-mitogenic effect of TAK1 deficiency in keratinocytes. Dotted white line represents epidermal-dermal junction. H&E: Haematoxylin and eosin staining. Scale bar 40  $\mu\text{m}$ . Mean proliferating cells was numerated from 3 standardized microscopic fields per section, performed on 3 sections from 3 independent OTC constructions ( $n=27$ ).

Figure S6. Ectopic expression of pVHL in  $K_{TAK1-B}$  inhibits Sp1 binding to the promoters of PDGF-B, integrins  $\beta 1$  and  $\beta 5$ . Chromatin from vector- or pVHL-transfected  $K_{TAK1-B}$  was immunoprecipitated with either an anti-Sp1 antibody (Ab) or preimmune IgG (pre). Enrichment of a DNA fragment encompassing the Sp1 binding sites was evaluated by PCR. Aliquots of the extracts were

also used before immunoprecipitation (input). Two stable  $K_{TAK1-B}$  clones expressing pVHL were used. No amplified signal was obtained in using pre-immune IgG. A control region upstream of NF- $\kappa$ B binding site served as negative control.

Figure S7. pVHL suppresses migration and proliferation via a HIF $\alpha$ -independent fashion. **(A)** Immunoblot analysis of HIF $\alpha$  on  $K_{CTRL}$ ,  $K_{TAK1-B}$  and TAK1-transfected  $K_{TAK1-B}$  epidermis (left panel).  $\beta$ -tubulin showed equal loading and transfer. Time-lapsed images of wounded cultures in cobalt chloride-simulated (50 mM) hypoxia condition. See videos S8. Scale bar 100  $\mu$ m. **(B)** Immunohistochemical analysis of pVHL skin wound biopsy. Immunohistochemical staining of Day 5 mouse wound biopsies with either pre-immune IgG as negative control (left panel) or with anti-pVHL antibody (right panel). The section was processed as described in Figure 1B. DAB with nickel (dark blue) was used as substrate. Representative picture from wound epithelium and the adjacent wound bed was shown. Scale bar 20  $\mu$ m.

A

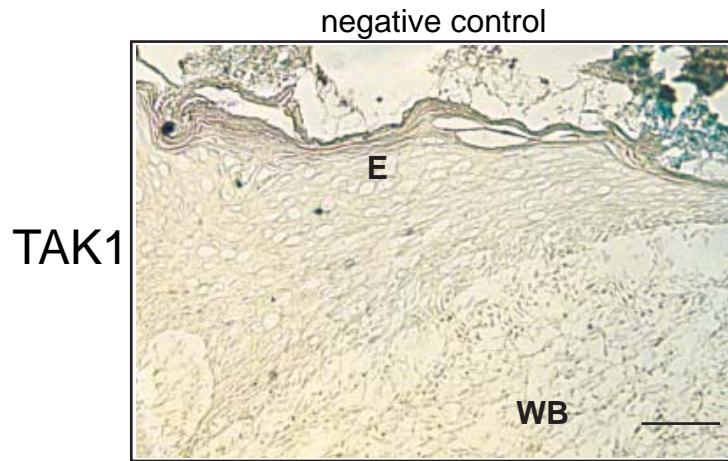

B

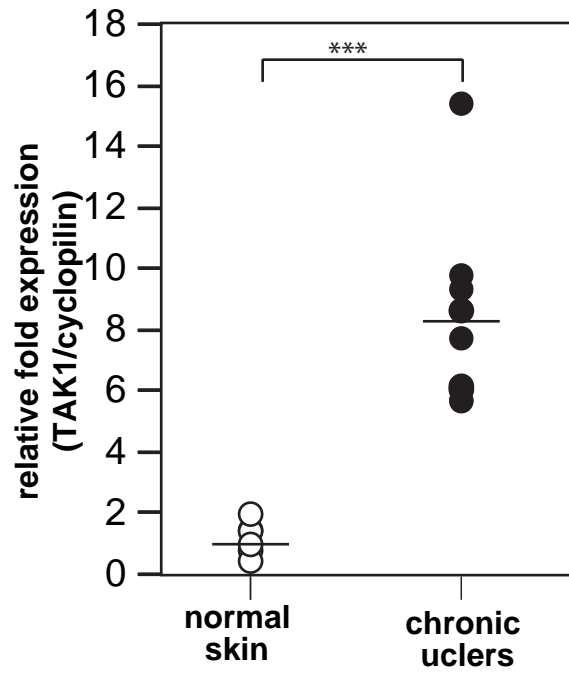

mitomycin C

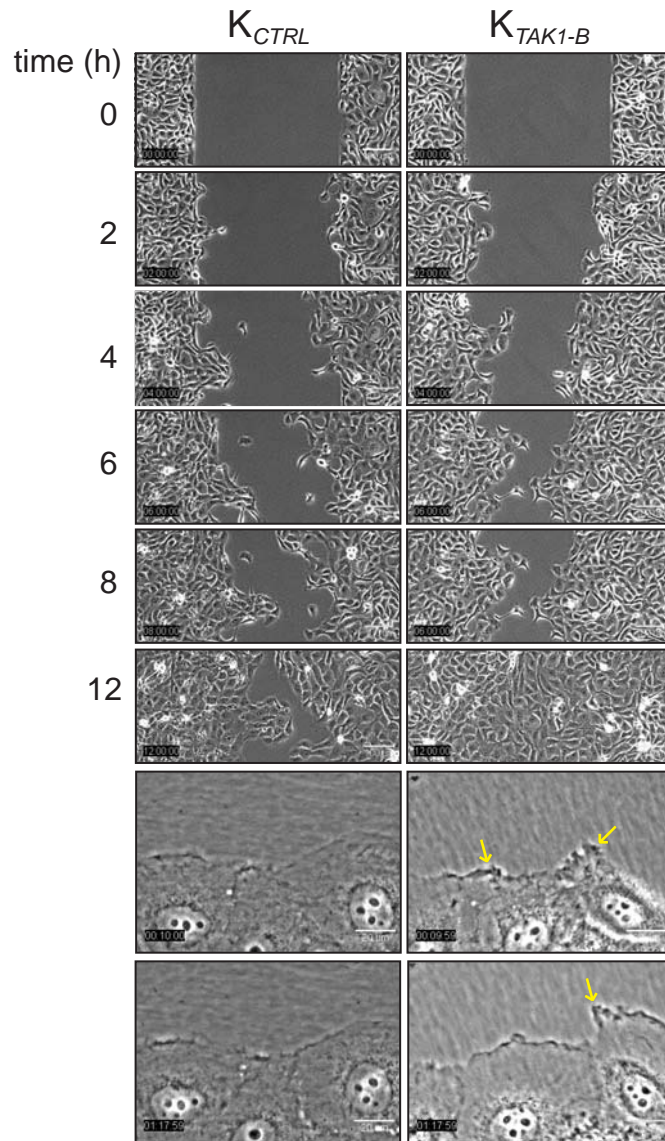

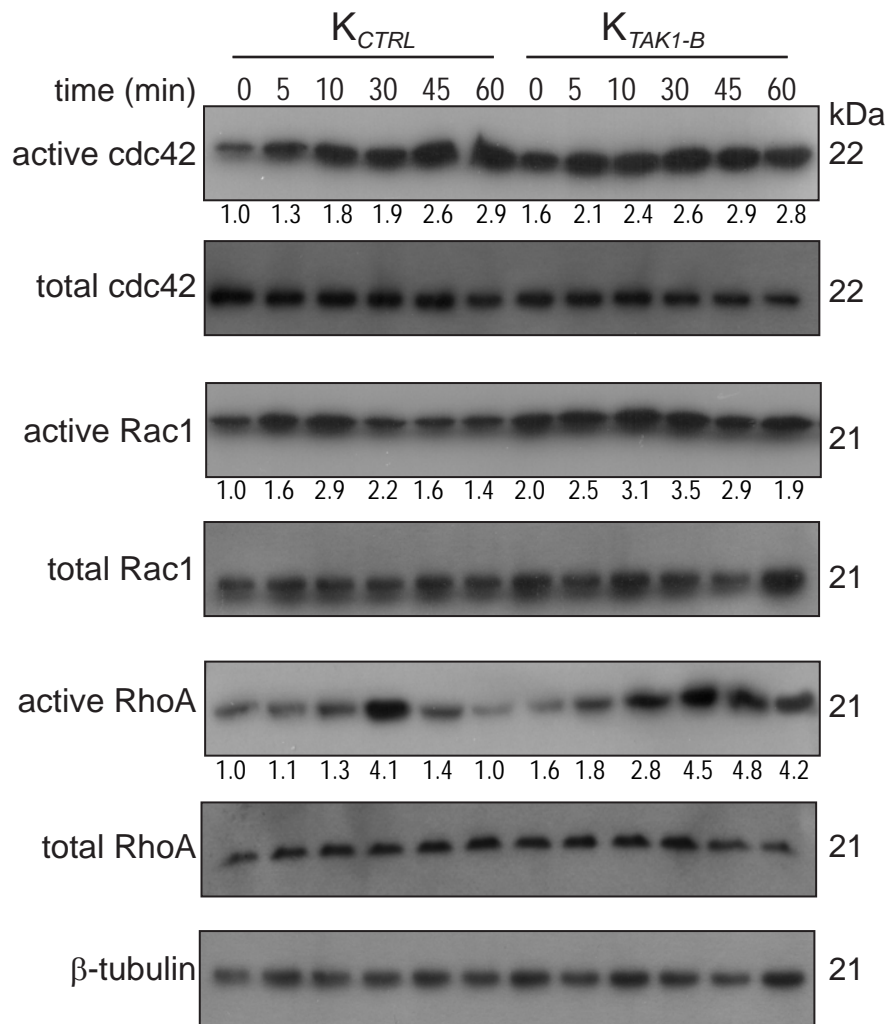

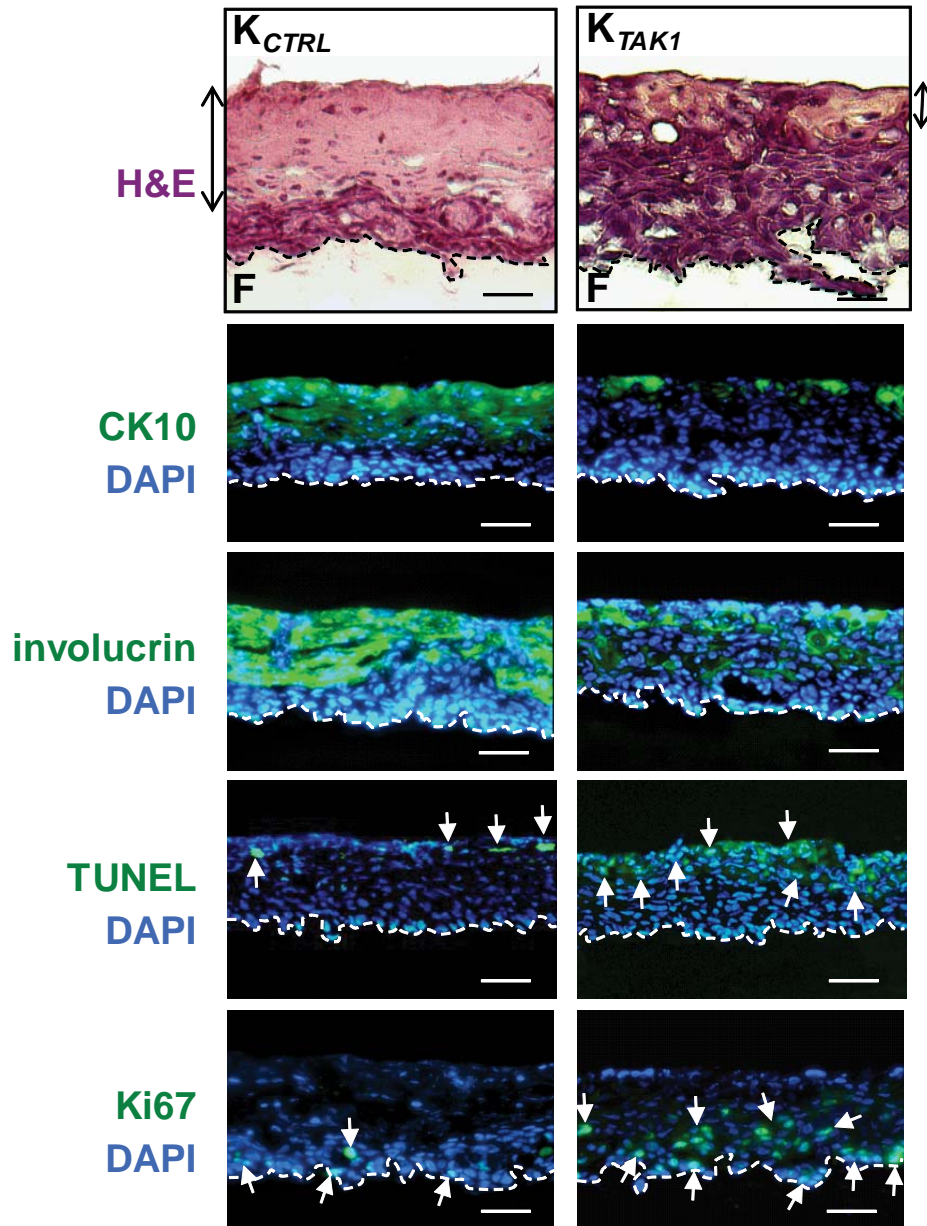



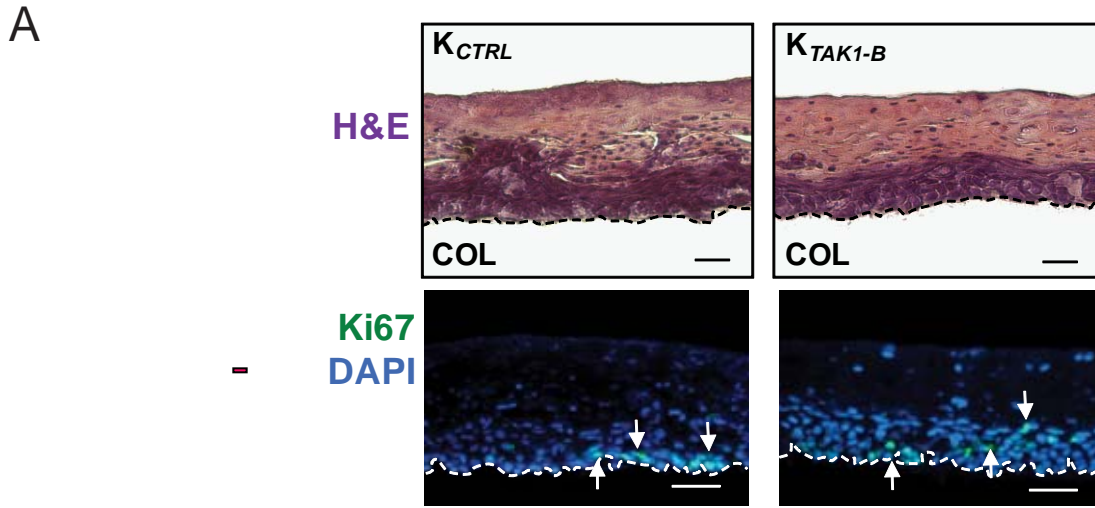

**B**

Human Growth Factor Antibody Array I Map

|   | A      | B             | C            | D              | E              | F               | G              | H       | I       | J       | K     | L        |
|---|--------|---------------|--------------|----------------|----------------|-----------------|----------------|---------|---------|---------|-------|----------|
| 1 | POS    | POS           | NEG          | NEG            | AR             | bFGF            | b-NGF          | EGF     | EGF R   | FGF-4   | FGF-6 | FGF-7    |
| 2 | POS    | POS           | NEG          | NEG            | AR             | bFGF            | b-NGF          | EGF     | EGF R   | FGF-4   | FGF-6 | FGF-7    |
| 3 | GCSF   | GDNF          | GM-CSF       | HB-EGF         | HGF            | IGFBP-1         | IGFBP-2        | IGFBP-3 | IGFBP-4 | IGFBP-6 | IGF-I | IGF-I SR |
| 4 | GCSF   | GDNF          | GM-CSF       | HB-EGF         | HGF            | IGFBP-1         | IGFBP-2        | IGFBP-3 | IGFBP-4 | IGFBP-6 | IGF-I | IGF-I SR |
| 5 | IGF-II | M-CSF         | M-CSF R      | NT-3           | NT-4           | PDGF R $\alpha$ | PDGF R $\beta$ | PDGF-AA | PDGF-AB | PDGF-BB | PIGF  | SCF      |
| 6 | IGF-II | M-CSF         | M-CSF R      | NT-3           | NT-4           | PDGF R $\alpha$ | PDGF R $\beta$ | PDGF-AA | PDGF-AB | PDGF-BB | PIGF  | SCF      |
| 7 | SCF R  | TGF- $\alpha$ | TGF- $\beta$ | TGF- $\beta$ 2 | TGF- $\beta$ 3 | VEGF            | VEGF R2        | VEGF R3 | VEGF-D  | BLANK   | BLANK | POS      |
| 8 | SCF R  | TGF- $\alpha$ | TGF- $\beta$ | TGF- $\beta$ 2 | TGF- $\beta$ 3 | VEGF            | VEGF R2        | VEGF R3 | VEGF-D  | BLANK   | BLANK | POS      |

\* For use with serum, plasma, condition medium, urine and all other body fluids, cell lysates and certain tissue lysates samples

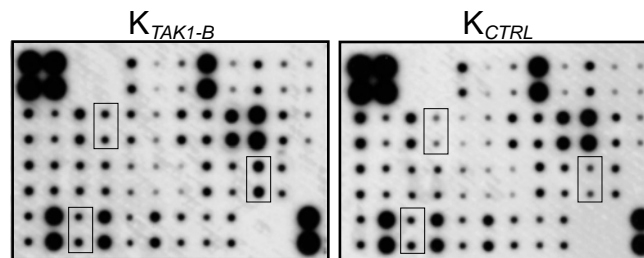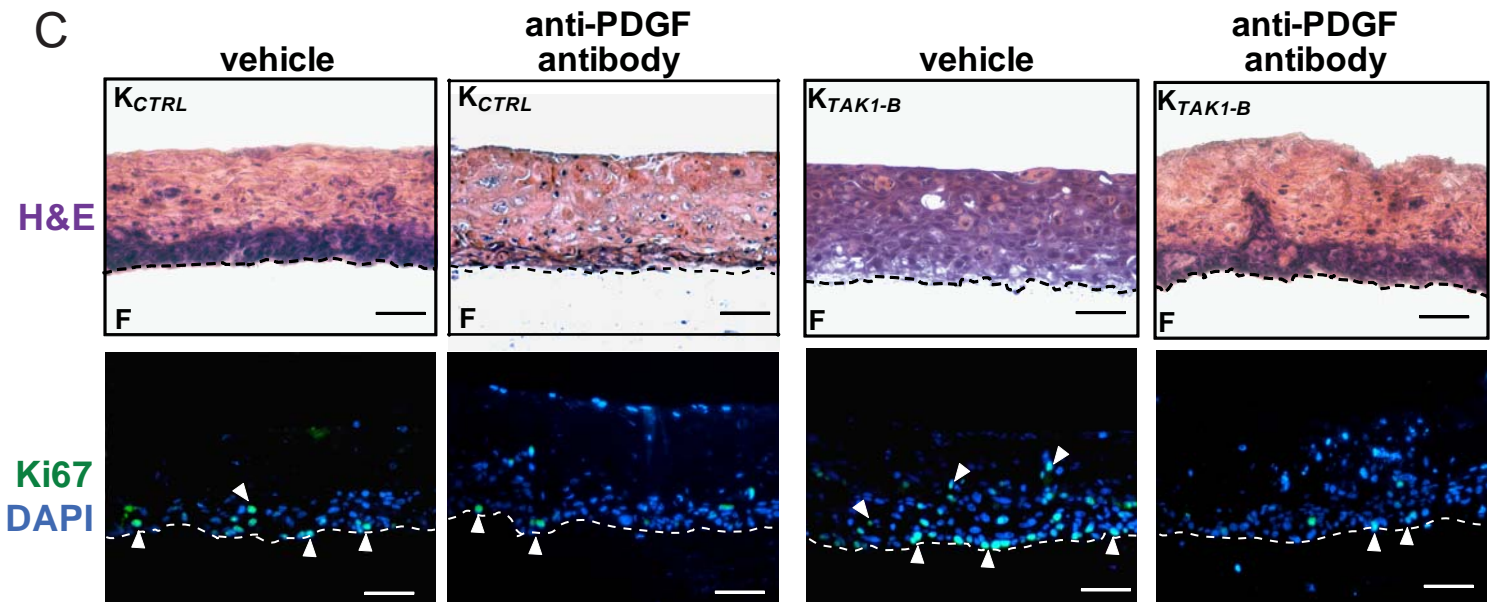

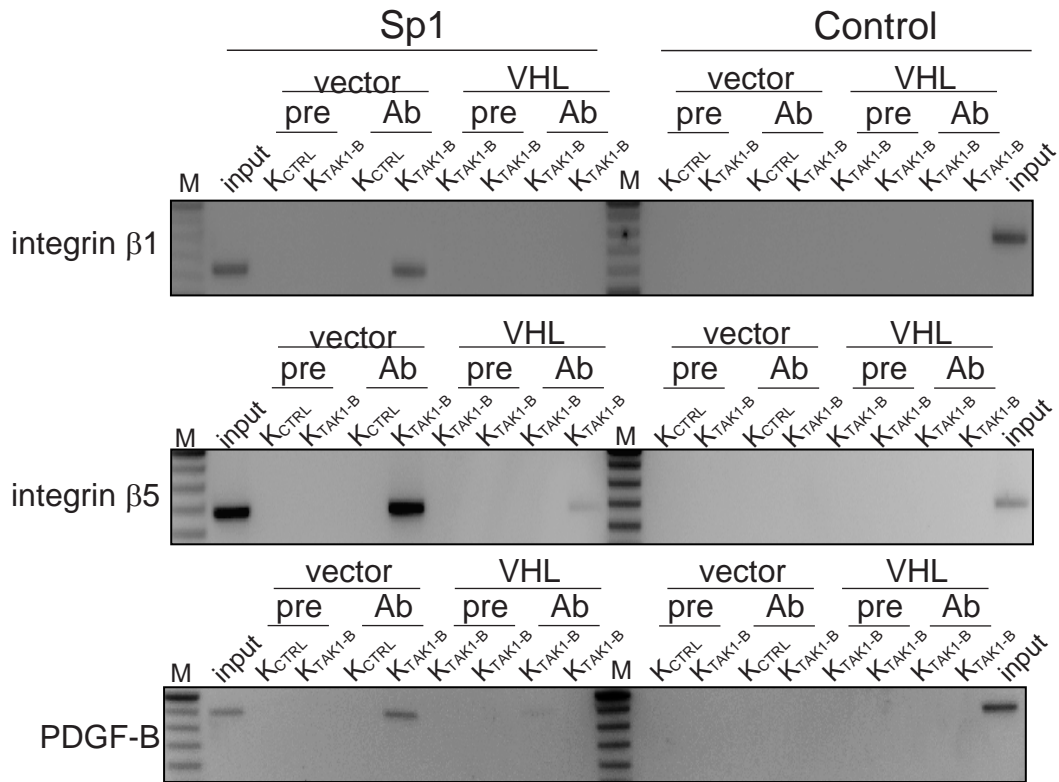



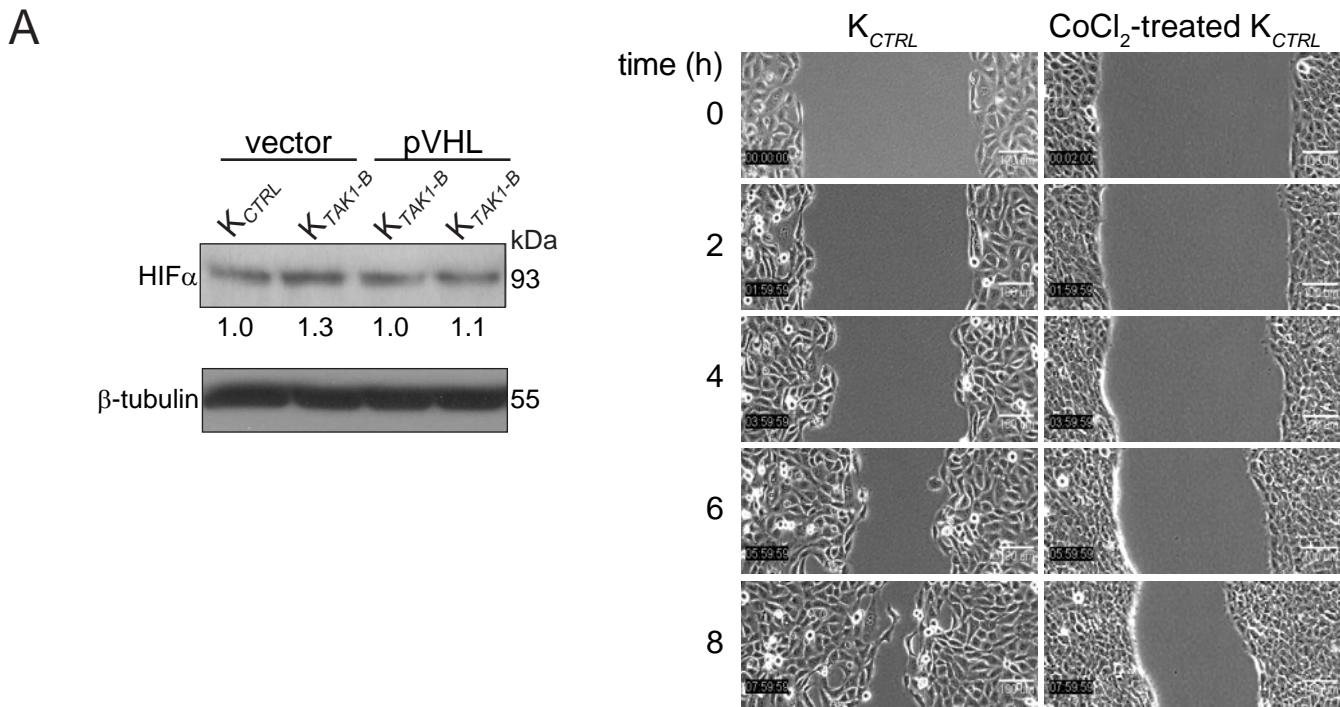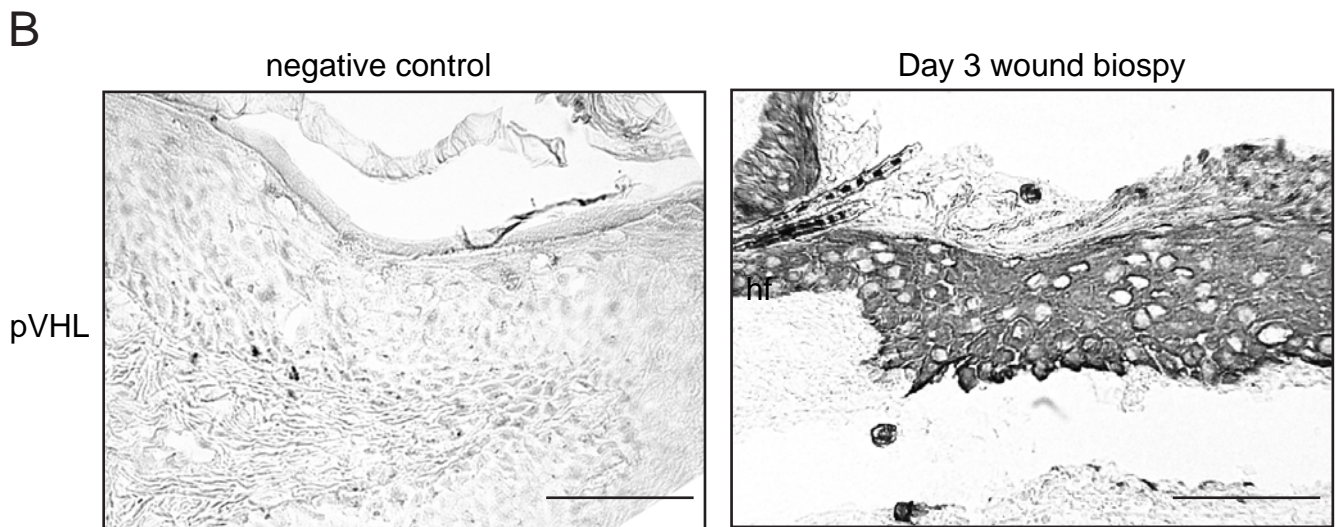

## SUPPLEMENTAL TABLE

**Table S1.** Oligonucleotide sequences

| Primer pairs (S: sense; AS: anti-sense) | Sequence (5'-3')                  |
|-----------------------------------------|-----------------------------------|
| Actin S                                 | CTTCTCTCTAAGGAGAATGGCCCAG         |
| Actin AS                                | CAACTGGTCTCAAGTCAGTGACAGG         |
| Actin RT1                               | ACGTGGACATCCGCAAAGAC              |
| Actin RT2                               | CGCTCAGGAGGAGCAATGAT              |
| HGF S                                   | TCCCTTCTCGAGACTTGAAAGAT           |
| HGF AS                                  | CTGCATTTCTCATTTCCATT              |
| PDGFB S                                 | TGAACATGACCCGCTCCCACTC            |
| PDGFB AS                                | TGCCGTCTTGTCATGCGTGTG             |
| PDGFA S                                 | CGGATACCTCGCCCATGTTCTG            |
| PDGFA AS                                | TCCGGATTCAGGCTTGTGGTCG            |
| TAK A1                                  | <u>AAAG</u> AAGAGGTTGTTGGAAGAGGAG |
| TAK A2                                  | <u>AAAA</u> CTCTCTTCCAACAACCTCTT  |
| TAK B1                                  | <u>AAAG</u> TGGCTTATCTTACACTGGA   |
| TAK B2                                  | <u>AAAA</u> TCCAGTGTAAGATAAGCCA   |
| TAK1 RT1                                | GTTCCGTGTAAGGGCTTTGA              |
| TAK1 RT2                                | GAGCAGCTGCCACTTACCTTTACA          |
| U6                                      | GCTTACCGTAACTTGAAAGTATTTCCG       |
| H1                                      | CTGGGAAATCACCATAAACGTGAA          |
| pVHL promoter S                         | GATCCTCGAGCGTGATGATTGGGTGTTCCC    |
| pVHL promoter AS                        | GATCAAGCTTCGACGCCTGCCTCCTCCGCG    |
| <b>chIP primers (S, AS)</b>             |                                   |
| ITGB1SP1_S                              | TCAGTGGACAAACGGGAGCGAG            |
| ITGB1SP1_AS                             | CTCTCCCTCCGGAAACGCATTC            |
| ITGB1control_S                          | TCGACATGCGTTCAGCCATTC             |

|                 |                        |
|-----------------|------------------------|
| ITGB1control_AS | GGAGTGATAATGTGCTTGCCTG |
| ITGB3SP1_S      | GGCGAGAGAGGAGCAATAG    |
| ITGB3SP1_AS     | GAGCCTCACTCACCTCCTAC   |
| ITGB3control_S  | TTGGAGCAGGATGAGGCTTTGC |
| ITGB3control_AS | CCCAGTACCAAAGAGGCCACTC |
| ITGB5SP1_S      | CATTTCCCTCCCTCCTTC     |
| ITGB5SP1_AS     | TGTGAATTGAGTTTGTTC     |
| ITGB5control_S  | GAGAGACAGCCCAGCATCTCAG |
| ITGB5control_AS | CACGCACACTGTGGACTTCACC |
| PDGFBSP1_S      | TCCGGGCCAGAAGAGGAAAG   |
| PDGFBSP1_AS     | CCCATCTTTGATCCTTCTG    |
| PDGFBcontrol_S  | GGTGAATCAGAGTGGAGTATG  |
| PDGFBcontrol_AS | CTGTGGACTGTCCTGAGGAG   |

---

**Mutagenesis primers**

|               |                                               |
|---------------|-----------------------------------------------|
| VHL mutant S  | GTGGATCGCGGAGGG <u>AgatCtCCGGAGGGCGGAGAAC</u> |
| VHL mutant AS | GTTCTCCGCCCTCCGGAGATCTCCCTCCGCGATCCAC         |

Underlined nucleotides indicate ‘sticky-ends’ that facilitate ligation with the *Bbs*I-digested siRNA expression vector.

## SUPPLEMENTAL VIDEO LEGENDS

**Videos.** *In vitro* scratch wound assay performed using (S1) control keratinocytes ( $K_{CTRL}$ ) and (S2) TAK1-deficient keratinocytes ( $K_{TAK1-B}$ ). Cell migration was recorded at 2 min interval for 9 h. Scale bar 100  $\mu$ m.

**Videos.** *In vitro* scratch wound assay performed using (S3) control keratinocytes ( $K_{CTRL}$ ) and (S4) TAK1-deficient keratinocytes ( $K_{TAK1-B}$ ) in the presence of 2  $\mu$ g/ml of mitomycin C. Cell migration was recorded at 2 min interval for 9 h. Scale bar 100  $\mu$ m.

**Videos.** Migratory front cell phenotype of (S5)  $K_{CTRL}$  and (S6)  $K_{TAK1-B}$ . Cell migration was recorded at 1 min interval for 2 h. Scale bar 20  $\mu$ m.

**Video S7.** *In vitro* scratch wound assay performed using TAK1-transfected  $K_{TAK1-B}$ . Cell migration was recorded at 2 min interval for 9 h. Scale bar 100  $\mu$ m.

**Video S8.** *In vitro* scratch wound assay performed using cobalt chloride-simulated hypoxia condition on control keratinocytes ( $K_{CTRL}$ ). Cell migration was recorded at 2 min interval for 9 h. Scale bar 100  $\mu$ m.
